# Supplementary material for: Reversed Polarity bi-tDCS over M1 during a Five Days Motor Task Training Did Not Influence Motor Learning. A Triple-Blind Clinical Trial
Source: MDPI journal article supplement (doi:10.3390/brainsci11060691), 2021-05-25
Supplement: s1 [file s1]

## Supplementary material.

**Table 1.** Descriptive analysis of sociodemographic data (n = 23). To evaluate the homogeneity of the different variables between groups. Independent Student's t-test was used for quantitative variables (mean  $\pm$  standard deviation) and Pearson's  $\chi^2$  for categorical variables (number of subjects and percentage).

| Variables           | Bi-RP-tDCS group (n = 13) | Sham group (n = 10) | p-value |
|---------------------|---------------------------|---------------------|---------|
| <b>Quantitative</b> |                           |                     |         |
| Age                 | 26.8 $\pm$ 5.3            | 23 $\pm$ 1.3        | 0.025   |
| Sleep Quality       | 4 $\pm$ 2.1               | 6.7 $\pm$ 2.9       | 0.026   |
| Physical activity   | 8485.2 $\pm$ 5620.3       | 6220.4 $\pm$ 3939.2 | 0.337   |
| Edinburgh Inventory | 19.8 $\pm$ 3.9            | 18.6 $\pm$ 3.3      | 0.760   |
| <b>Qualitative</b>  |                           |                     |         |
| Gender              |                           |                     |         |
| - Women             | 5                         | 8                   | 0.046   |
| - Man               | 8                         | 2                   |         |
| Educational level   |                           |                     |         |
| - High school       | 3                         | 0                   | 0.103   |
| - University        | 10                        | 10                  |         |

**Table 2.** Motor learning during bi-RP-tDCS. (mean  $\pm$  S.D) n =23 for fine motor dexterity and n = 20 for gross motor dexterity.

| Motor Dexterity |           | Group      | Basal condition | Post first training | Post training  | Post 5 days without training | Linear Mixed Model |         |       |         |            |         |
|-----------------|-----------|------------|-----------------|---------------------|----------------|------------------------------|--------------------|---------|-------|---------|------------|---------|
|                 |           |            |                 |                     |                |                              | Time               |         | Group |         | Time*Group |         |
|                 |           |            |                 |                     |                |                              | F                  | p-value | F     | p-value | F          | p-value |
| Fine<br>n = 23  | Unimanual | Bi-RP-tDCS | 16.9 $\pm$ 1.3  | 18.7 $\pm$ 1.6      | 20.6 $\pm$ 1.6 | 20.4 $\pm$ 1.4               | 30.9               | <0.001  | 5.8   | 0.018   | .4         | .765    |
|                 |           | Placebo    | 16.5 $\pm$ 1.7  | 18.7 $\pm$ 1.7      | 19.7 $\pm$ 1.7 | 19.3 $\pm$ 1.2               |                    |         |       |         |            |         |
|                 | Bimanual  | Bi-RP-tDCS | 13 $\pm$ 1      | 13.6 $\pm$ 0.9      | 14.2 $\pm$ 0.9 | 14.5 $\pm$ 1.2               | 9.9                | <0.001  | 0.9   | 0.353   | .4         | .790    |
|                 |           | Placebo    | 12.7 $\pm$ 1.4  | 13.7 $\pm$ 1.6      | 14.3 $\pm$ 1.8 | 14.4 $\pm$ 1.3               |                    |         |       |         |            |         |
| Gross<br>n = 20 | Unimanual | Bi-RP-tDCS | 62.4 $\pm$ 4.6  | 56.9 $\pm$ 3.3      | 55.6 $\pm$ 3.9 | 55.8 $\pm$ 4.1               | 11.6               | <0.001  | 4.8   | 0.032   | .2         | .879    |
|                 |           | Placebo    | 63.2 $\pm$ 4.5  | 60.8 $\pm$ 4        | 58.4 $\pm$ 3.6 | 57.3 $\pm$ 3.9               |                    |         |       |         |            |         |
|                 | Bimanual  | Bi-RP-tDCS | 46.9 $\pm$ 2.4  | 41.4 $\pm$ 2        | 40 $\pm$ 1.4   | 38.8 $\pm$ 2.3               | 34.5               | <0.001  | 11.3  | 0.001   | .2         | .884    |
|                 |           | Placebo    | 49.5 $\pm$ 4.8  | 43.6 $\pm$ 3.9      | 42 $\pm$ 3.5   | 41 $\pm$ 2.8                 |                    |         |       |         |            |         |

**Table 3.** Motor training and bi-RP-tDCS effects on grip strength (mean  $\pm$  SD), n = 23.

| Variable | Group | Basal condition | Post first training | Post training | Post 5 days without training | Linear Mixed Model |         |       |         |            |         |
|----------|-------|-----------------|---------------------|---------------|------------------------------|--------------------|---------|-------|---------|------------|---------|
|          |       |                 |                     |               |                              | Time               |         | Group |         | Time*Group |         |
|          |       |                 |                     |               |                              | F                  | p-value | F     | p-value | F          | p-value |

|               |                   |            |             |             |            |    |      |     |       |    |      |
|---------------|-------------------|------------|-------------|-------------|------------|----|------|-----|-------|----|------|
| Grip strength | <b>Bi-RP-tDCS</b> | 31.6 ± 8.6 | 33.1 ± 8.6  | 34.2 ± 9.7  | 35.2 ± 9.7 | .2 | .921 | 5.7 | 0.019 | .1 | .947 |
|               | <b>Placebo</b>    | 27.5 ± 9.6 | 29.2 ± 10.5 | 29.9 ± 11.8 | 28.9 ± 9.2 |    |      |     |       |    |      |

**Table 4.** Training and bi-RP-tDCS effects on sensory variables (mean ± SD), n = 23.

| Sensory thresholds       | Group             | Basal condition | Post first training | Post training | Post 5 days without training | Linear Mixed Model |         |       |         |            |         |
|--------------------------|-------------------|-----------------|---------------------|---------------|------------------------------|--------------------|---------|-------|---------|------------|---------|
|                          |                   |                 |                     |               |                              | Time               |         | Group |         | Time*Group |         |
|                          |                   |                 |                     |               |                              | F                  | p-value | F     | p-value | F          | p-value |
| Two-point discrimination | <b>Bi-RP-tDCS</b> | 12.7 ± 6.4      | 11.7 ± 6.3          | 11.5 ± 4.9    | 10.7 ± 6.5                   |                    |         |       |         |            |         |
|                          | <b>Placebo</b>    | 11.8 ± 5.5      | 11.3 ± 6            | 8.8 ± 4.5     | 8.8 ± 5.7                    | 1.6                | .184    | 2.3   | 0.132   | .2         | .882    |
| Mechanical detection     | <b>Bi-RP-tDCS</b> | .027 ± .012     | .026 ± .011         | .029 ± .014   | .033 ± .014                  |                    |         |       |         |            |         |
|                          | <b>Placebo</b>    | .024 ± .01      | .027 ± .017         | .028 ± .016   | .023 ± .012                  | .1                 | .959    | 1.3   | 0.265   | .5         | .668    |
| Thenar pressure pain     | <b>Bi-RP-tDCS</b> | 5.9 ± 1.9       | 5.9 ± 2             | 5.9 ± 1.8     | 6.4 ± 1.7                    |                    |         |       |         |            |         |
|                          | <b>Placebo</b>    | 5.6 ± 1.7       | 5.4 ± 1.5           | 5.3 ± 1.7     | 5.6 ± 1.6                    | .3                 | .840    | 2.2   | 0.137   | .1         | .951    |
| Bone pressure pain       | <b>Bi-RP-tDCS</b> | 7.2 ± 3         | 6.8 ± 2.9           | 7.7 ± 2.6     | 7.8 ± 2.8                    |                    |         |       |         |            |         |
|                          | <b>Placebo</b>    | 6.9 ± 2.3       | 7.2 ± 2.9           | 7.1 ± 2.8     | 7.9 ± 3.4                    | .2                 | .884    | 0.001 | 0.982   | .3         | .851    |

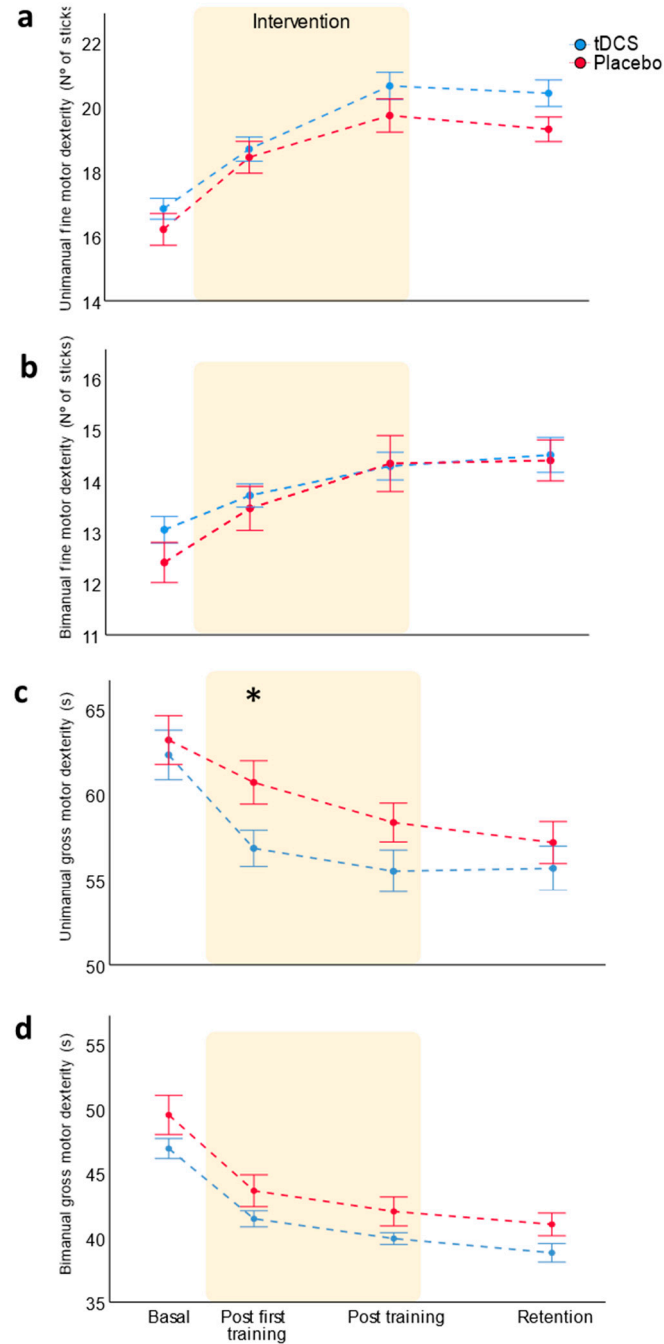

**Figure S1.** Bi-RP-tDCS effects on motor learning training. This figure shows the temporal evolution of the different motor dexterity variables assessed along days: (a) unimanual and (b) bimanual fine motor dexterity (n = 23); (c) unimanual and (d) bimanual gross motor dexterity (n = 20). The data representation shows mean  $\pm$  SEM.

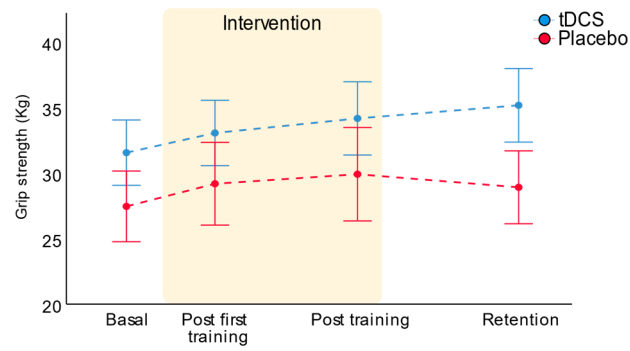

**Figure S2.** Bi-RP-tDCS effects on grip strength (n = 23).

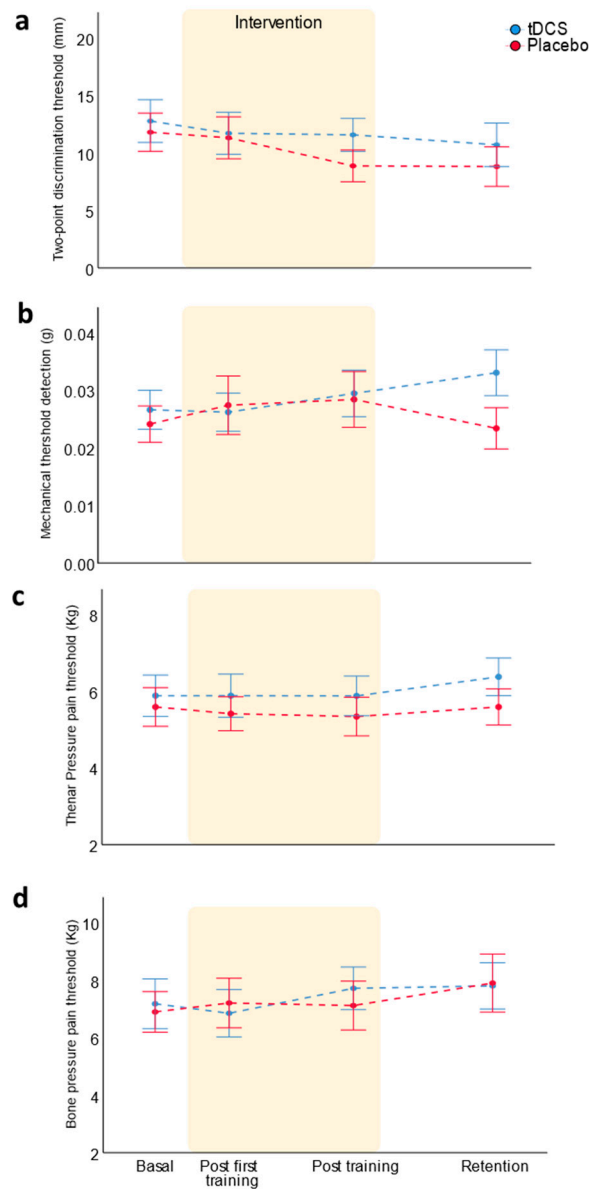

**Figure S3.** Bi-RP-tDCS and training effects on hand sensitivity along days (n = 23). (a) two-point discrimination; (b) mechanical detection threshold; (c) pressure pain threshold in the thenar eminence; (d) pain pressure pain threshold in the diaphysis of the second metacarpal bone. The data representation shows mean  $\pm$  SEM.
